# Supplementary material
Source: Research Square preprint supplement (doi:10.21203/rs.3.rs-8918280/v1)
Supplement: Supplementary file 1 [file 0853c0527c103a0f136af7b3.xlsx]

## Sheet: Data S1
	Supplementary Data S1. JUB1-X synTF.
	(b) Transcriptional output of JUB1-X synTF harboring X motif at 114 cystein
	Samples	Replicate 1	Replicate 2	Replicate 3	Replicate 4	Replicate 5	Replicate 6	Non-induced	STDEV.S	Replicate 1	Replicate 2	Replicate 3	Replicate 4	Replicate 5	Replicate 6	Induced	STDEV.S	T.TEST
	WT	303	333	327	596	614	548	453.5	14708467	880	533	698	646	645	487	64816667	13819033	0.04026
	ProTDH3	665000	661000	672000	636000	658000	665000	659500	1243784547	668000	649000	678000	604000	568000	567000	62233333333	4948804569	0.09299
	JUB1-GAL4AD/4X	1631	1789	1709	1102	1071	1102	140066667	34234758	34414	35013	32619	35260	29490	29008	32634	278412478	0.000002
	JUB1-XC114-GAL4AD	553	545	577	1271	1293	1231	91166667	38771054	1048	993	907	1060	1050	1052	101833333	5964786	0.307956
	JUB1-XC114-GAL4AD/4X	84497	88205	86409	95333	89379	88307	8868833333	368158328	349224	319607	361394	234728	245189	259670	29496866667	5534611563	0.000343
	JUB1-XC191-GAL4AD	609	670	614	1076	992	1016	829.5	22020513	932	928	877	1043	1085	1097	99366667	9292936	0.09299
	JUB1-XC191-GAL4AD/4X	99261	109546	108410	118114	121454	118589	11256233333	836025188	421000	395316	404000	405000	389420	391090	400971	1174399685	<0.000001
	(c) Transcriptional output of JUB1-X synTF harboring X motif at c 191 cystein.
	Samples	Replicate 2	Replicate 3	Replicate 4	Replicate 5	Replicate 6	Replicate 3	Non-induced	STDEV.S	Replicate 1	Replicate 2	Replicate 3	Replicate 4	Replicate 5	Replicate 6	Induced	STDEV.S	T.TEST
	WT	303	333	327	596	614	548	453.5	14708467	880	533	698	646	645	487	64816667	13819033	0.571364
	ProTDH3	665000	661000	672000	636000	658000	665000	659500	1243784547	668000	649000	678000	604000	568000	567000	62233333333	4948804569	0.01902
	JUB1-GAL4AD/4X	153683	150825	154991	110673	111557	108012	131623.5	2366622067	598000	585000	587000	504000	505000	495000	54566666667	4889035351	<0.000001
	JUB1-XC114-GAL4AD	899	936	811	956	972	858	90533333	6185682	2043	2120	2114	1722	1778	1632	1901.5	21588122	0.571364
	JUB1-XC114-GAL4AD/4X	99517	117096	116326	98239	102377	103212	10612783333	840013008	294866	269624	214710	172486	155615	163688	211831.5	5876928933	<0.000001
	JUB1-XC191-GAL4AD	904	1013	1036	876	876	876	93016667	742278	1659	1794	1738	1916	1824	2240	186183333	20418268	0.571364
	JUB1-XC191-GAL4AD/4X	83263	89695	91471	98012	94215	98308	92494	567987767	224141	206252	169740	157902	165392	145587	178169	3036022877	<0.000001
