# Supplementary material
Source: Research Square preprint supplement (doi:10.21203/rs.3.rs-8918280/v1)
Supplement: Supplementary file 2 [file 931220585564196437f0d0ad.xlsx]

## Sheet: Data S2
	Supplementary Data S2.Tunable transcriptional activation by JUB1-X synthetic transcription factors through binding-site copy number modulation
	(a) Transcriptional output of four JUB1-X synTF variant JUB1-X114-GAL4AD
	Sample	Repeat 1	Repeat 2	Repeat 3	Repeat 4	Repeat 5	Repeat 6	Non-induced	STDEV.S	Repeat 1	Repeat 2	Repeat 3	Repeat 4	Repeat 5	Repeat 6	Induced	STDEV.S	T.TEST
	WT	303	333	327	596	614	548	453.5	147.085	880	533	698	646	645	487	648.167	138.19	0.43115
	JUB1-XC114-GAL4AD	553	545	577	1271	1293	1231	911.667	387.711	1048	993	907	1060	1050	1052	1018.33	59.6479	0.43115
	JUB1-XC114-GAL4AD/1X	1451	1447	1486	2650	2677	2673	2064	660.392	59579	59803	66883	42713	58973	36457	54068	11752.7	0.011039
	JUB1-XC114-GAL4AD/2X	9527	9438	8591	10913	11166	11264	10149.8	1111.84	251912	231606	252330	151055	139421	153442	196628	54031.6	<0.000001
	JUB1-XC114-GAL4AD/3X	53932	46939	51092	53346	54007	52830	52024.3	2709.09	282781	300601	300423	195107	185360	183904	241363	58805	<0.000001
	JUB1-XC114-GAL4AD/4X	84497	88205	86409	95333	89379	88307	88688.3	3681.58	349224	319607	361394	234728	245189	259670	294969	55346.1	<0.000001
	JUB1-XC114-GAL4AD/6X	244492	209191	176123	130680	133147	133185	171136	47695.5	452000	468000	456000	306482	301129	293781	379565	86904.7	<0.000001
	(b) Transcriptional output of four JUB1-X synTF variant JUB1-X191-GAL4AD
	Sample	Repeat 1	Repeat 2	Repeat 3	Repeat 4	Repeat 5	Repeat 6	Non-induced	STDEV.S	Repeat 1	Repeat 2	Repeat 3	Repeat 4	Repeat 5	Repeat 6	Induced	STDEV.S	T.TEST
	WT	303	333	327	596	614	548	453.5	147.085	880	533	698	646	645	487	648.167	138.19	0.286551
	JUB1-XC191-GAL4AD	609	670	614	1076	992	1016	829.5	220.205	932	928	877	1043	1085	1097	993.667	92.9294	0.286551
	JUB1-XC191-GAL4AD/1X	4933	4785	4944	3574	3613	3495	4224	729.803	78712	86898	89577	99389	87779	90861	88869.3	6683.97	9e-06
	JUB1-XC191-GAL4AD/2X	6775	6830	6558	9591	9497	9157	8068	1485.4	119520	160497	73922	162801	146806	134882	133071	33197.1	<0.000001
	JUB1-XC191-GAL4AD/3X	67455	70511	51742	43509	43030	42972	53203.2	12704	344163	292263	304819	89854	161318	189205	230270	98518.7	<0.000001
	JUB1-XC191-GAL4AD/4X	99261	109546	108410	118114	121454	118589	112562	8360.25	421000	395316	404000	405000	389420	391090	400971	11744	<0.000001
	JUB1-XC191-GAL4AD/6X	192616	212505	226140	171475	152375	147923	183839	32003	337686	434000	419000	485000	414000	443000	422114	48447.4	<0.000001
	(c) Transcriptional output of four JUB1-X synTF variant JUB1-X114-EDLLAD
	Sample	Repeat 1	Repeat 2	Repeat 3	Repeat 4	Repeat 5	Repeat 6	Non-induced	STDEV.S	Repeat 1	Repeat 2	Repeat 3	Repeat 4	Repeat 5	Repeat 6	Induced	STDEV.S	T.TEST
	WT	303	333	327	596	614	548	453.5	147.085	880	533	698	646	645	487	648.167	138.19	0.429456
	JUB1-XC114-EDLLAD	899	936	811	956	972	858	905.333	61.8568	2043	2120	2114	1722	1778	1632	1901.5	215.881	0.429456
	JUB1-XC114-EDLLAD/1X	1708	1786	1809	2823	2857	2883	2311	596.436	21010	19100	20674	20406	25523	22137	21475	2212.05	0.202342
	JUB1-XC114-EDLLAD/2X	11631	11048	11123	8951	8913	8988	10109	1284.87	112200	135987	120995	33917	39440	41009	80591.3	47199.4	0.000479
	JUB1-XC114-EDLLAD/3X	64680	67554	68386	170369	176588	177487	120844	59185.5	242708	263174	226077	407000	262969	332829	289126	68252.1	<0.000001
	JUB1-XC114-EDLLAD/4X	99517	117096	116326	98239	102377	103212	106128	8400.13	294866	269624	214710	172486	155615	163688	211832	58769.3	1e-06
	JUB1-XC114-EDLLAD/6X	165547	177815	175951	153275	155736	151562	163314	11586.9	317170	224319	281773	182320	228704	252092	247730	47304.1	5.8e-05
	(d) Transcriptional output of four JUB1-X synTF variant JUB1-X191-EDLLAD
	Sample	Repeat 1	Repeat 2	Repeat 3	Repeat 4	Repeat 5	Repeat 6	Non-induced	STDEV.S	Repeat 1	Repeat 2	Repeat 3	Repeat 4	Repeat 5	Repeat 6	Induced	STDEV.S	T.TEST
	WT	303	333	327	596	614	548	453.5	147.085	880	533	698	646	645	487	648.167	138.19	0.718031
	JUB1-XC191-EDLLAD	904	1013	1036	876	876	876	930.167	74.2278	1659	1794	1738	1916	1824	2240	1861.83	204.183	0.718031
	JUB1-XC191-EDLLAD/1X	2408	2394	2459	3970	3919	3839	3164.83	816.914	61557	66882	45297	59537	68356		60325.8	9157.93	0.102782
	JUB1-XC191-EDLLAD/2X	7223	7079	7955	7916	12094	12432	9116.5	2465.16	70639	69444	90549	75362	133838	81511	86890.5	24280.8	0.026211
	JUB1-XC191-EDLLAD/3X	82624	77653	85082	100821	100317	100927	91237.3	10628.2	218791	239372	252971	614000	580000	243825	358160	185655	<0.000001
	JUB1-XC191-EDLLAD/4X	83263	89695	91471	98012	94215	98308	92494	5679.88	224141	206252	169740	157902	165392	145587	178169	30360.2	0.018823
	JUB1-XC191-EDLLAD/6X	148237	152606	148816	177100	168909	172375	161340	12901.6	440000	484000	498000	616000	657000	633000	554667	91349.1	<0.000001
	(e) Time course growth assay of yeast cells containing chromosomally integrated JUB1-X synTFs controlling reporter gene expression in induction medium.
		Time	0	15	30	45	01:00:00	01:15:00	01:30:00	01:45:00	02:00:00	02:15:00	02:30:00	02:45:00	03:00:00	03:15:00	03:30:00	03:45:00	04:00:00	04:15:00	04:30:00	04:45:00	05:00:00	05:15:00	05:30:00	05:45:00	06:00:00	06:15:00	06:30:00	06:45:00	07:00:00	07:15:00	07:30:00	07:45:00	08:00:00	08:15:00	08:30:00	08:45:00	09:00:00	09:15:00	09:30:00	09:45:00	10:00:00	10:15:00	10:30:00	10:45:00	11:00:00	11:15:00	11:30:00
	WT	Replicate 1	0.2277	0.2327	0.2374	0.242	0.2425	0.2465	0.2502	0.2537	0.2586	0.2622	0.2673	0.2717	0.2768	0.2831	0.2887	0.2971	0.3049	0.3124	0.3218	0.3329	0.3421	0.3549	0.3674	0.3813	0.3979	0.4154	0.4342	0.4541	0.4733	0.4949	0.5181	0.5435	0.5699	0.5949	0.6251	0.6531	0.6852	0.7178	0.7509	0.7863	0.8206	0.8582	0.8947	0.9315	0.9722	1.0117	1.0521
		Replicate 2	0.2527	0.2563	0.2602	0.2621	0.2658	0.2696	0.2734	0.2772	0.2817	0.2866	0.2903	0.2971	0.3028	0.3091	0.315	0.3222	0.3312	0.3398	0.3494	0.3597	0.373	0.3852	0.399	0.414	0.4309	0.4492	0.4682	0.489	0.5101	0.5345	0.5576	0.5816	0.6077	0.6367	0.6666	0.698	0.7285	0.7612	0.7946	0.83	0.8673	0.9018	0.9408	0.9776	1.0169	1.0563	1.0978
		Replicate 3	0.212	0.2166	0.2202	0.2241	0.2278	0.2308	0.2349	0.2392	0.2434	0.2477	0.2538	0.2588	0.2651	0.2717	0.2785	0.2867	0.2942	0.3053	0.3136	0.3262	0.3383	0.352	0.3668	0.3839	0.401	0.42	0.4414	0.4619	0.4858	0.5112	0.5359	0.5636	0.5904	0.6202	0.649	0.6823	0.7157	0.7488	0.7862	0.8255	0.8588	0.8954	0.9352	0.9738	1.0152	1.0572	1.0999
	JUB1-XC114-GAL4AD/2X	Replicate 1	0.2029	0.2059	0.2048	0.2066	0.2069	0.2066	0.2089	0.2094	0.2126	0.213	0.215	0.2164	0.2191	0.2224	0.2234	0.2248	0.2272	0.2285	0.2307	0.2329	0.2344	0.2375	0.2391	0.2415	0.2437	0.2467	0.2509	0.252	0.2554	0.2587	0.2627	0.2636	0.267	0.2715	0.2749	0.2783	0.2826	0.2865	0.2933	0.2972	0.3005	0.305	0.3109	0.3177	0.3235	0.3308	0.3372
		Replicate 2	0.187	0.1871	0.1881	0.189	0.1905	0.1917	0.1937	0.1936	0.1962	0.1971	0.1991	0.2009	0.2017	0.2046	0.207	0.2081	0.2106	0.2118	0.2148	0.2172	0.2191	0.2209	0.2244	0.2254	0.2288	0.2318	0.2351	0.2367	0.24	0.2437	0.2471	0.2501	0.2525	0.2572	0.261	0.2644	0.2691	0.2734	0.2782	0.283	0.2894	0.2939	0.2983	0.305	0.3109	0.3186	0.3259
		Replicate 3	0.2172	0.2192	0.2209	0.224	0.2259	0.2267	0.228	0.2299	0.2319	0.2321	0.2347	0.2358	0.2385	0.2409	0.2428	0.2445	0.2478	0.2503	0.2531	0.2541	0.2567	0.2588	0.2612	0.2645	0.2691	0.2738	0.2745	0.2788	0.2827	0.2856	0.2901	0.2933	0.296	0.3005	0.3056	0.3091	0.3147	0.3219	0.3269	0.3311	0.3378	0.3426	0.3507	0.3566	0.3638	0.3702	0.3784
	JUB1-XC191-EDLLAD/6X	Replicate 1	0.197	0.184	0.179	0.1773	0.1775	0.1772	0.1791	0.1785	0.1802	0.181	0.181	0.1813	0.1824	0.1827	0.1836	0.1842	0.1848	0.1844	0.1859	0.1856	0.1862	0.1865	0.1871	0.1869	0.1882	0.1881	0.1886	0.1881	0.189	0.1895	0.1894	0.1906	0.1899	0.1915	0.1914	0.1907	0.1914	0.1926	0.1927	0.1926	0.1936	0.1937	0.1947	0.1948	0.1946	0.195	0.195
		Replicate 2	0.1988	0.1987	0.1987	0.1976	0.199	0.1995	0.2007	0.2009	0.2016	0.203	0.2046	0.2039	0.2059	0.2084	0.2105	0.2109	0.2131	0.2145	0.2146	0.2148	0.2157	0.2162	0.217	0.2167	0.2177	0.2186	0.2195	0.2194	0.2197	0.2209	0.2209	0.2216	0.2216	0.222	0.2227	0.2228	0.2233	0.2235	0.2239	0.2242	0.2247	0.2253	0.225	0.2259	0.2252	0.2245	0.224
		Replicate 3	0.1766	0.1769	0.1768	0.1767	0.177	0.1769	0.1774	0.1784	0.1779	0.1799	0.1795	0.1802	0.1817	0.1817	0.1835	0.1839	0.1844	0.1852	0.1856	0.1865	0.187	0.1875	0.1882	0.1876	0.1885	0.1891	0.1896	0.1904	0.1909	0.1902	0.1909	0.1918	0.1923	0.1926	0.1927	0.1934	0.1936	0.1941	0.1943	0.1946	0.1947	0.196	0.1959	0.197	0.197	0.1969	0.1978
	ProTDH3	Replicate 1	0.17	0.171	0.171	0.173	0.174	0.174	0.175	0.175	0.178	0.177	0.18	0.18	0.18	0.184	0.186	0.186	0.187	0.19	0.192	0.194	0.196	0.2	0.201	0.201	0.205	0.207	0.212	0.212	0.216	0.219	0.224	0.225	0.231	0.234	0.239	0.243	0.246	0.254	0.258	0.261	0.266	0.275	0.279	0.29	0.295	0.299	0.306
		Replicate 2	0.2087	0.2082	0.2091	0.2086	0.2098	0.2103	0.2125	0.2138	0.2149	0.2151	0.2158	0.2147	0.2145	0.2142	0.2171	0.2188	0.2186	0.2179	0.2179	0.2183	0.2183	0.2171	0.218	0.2195	0.2212	0.222	0.2221	0.2226	0.2214	0.221	0.2215	0.2217	0.2222	0.2241	0.226	0.226	0.2266	0.2267	0.2259	0.2261	0.2263	0.2262	0.2285	0.2318	0.2292	0.2231	0.2242
		Replicate 3	0.177	0.1764	0.1769	0.1773	0.1774	0.1784	0.18	0.1821	0.1832	0.1838	0.1842	0.1828	0.1828	0.1826	0.1849	0.1873	0.1875	0.1872	0.1863	0.1874	0.1874	0.1871	0.1868	0.1884	0.1906	0.1921	0.1915	0.1912	0.1918	0.1902	0.1905	0.1911	0.1912	0.1931	0.1954	0.1951	0.1962	0.1951	0.1951	0.1941	0.1948	0.1945	0.197	0.199	0.1957	0.1948	0.196
	(f) Time course growth assay of yeast cells containing chromosomally integrated JUB1-X synTFs controlling reporter gene expression in non-induction medium.
		Time	0	15	30	45	01:00:00	01:15:00	01:30:00	01:45:00	02:00:00	02:15:00	02:30:00	02:45:00	03:00:00	03:15:00	03:30:00	03:45:00	04:00:00	04:15:00	04:30:00	04:45:00	05:00:00	05:15:00	05:30:00	05:45:00	06:00:00	06:15:00	06:30:00	06:45:00	07:00:00	07:15:00	07:30:00	07:45:00	08:00:00	08:15:00	08:30:00	08:45:00	09:00:00	09:15:00	09:30:00	09:45:00	10:00:00	10:15:00	10:30:00	10:45:00	11:00:00	11:15:00	11:30:00
	WT	Replicate 1	0.2324	0.2353	0.2393	0.2425	0.2454	0.2482	0.2517	0.256	0.2603	0.2655	0.2693	0.2738	0.2802	0.2858	0.2919	0.2998	0.3055	0.3142	0.3228	0.3327	0.342	0.3542	0.3661	0.3793	0.3945	0.4098	0.426	0.446	0.4648	0.486	0.5081	0.5322	0.558	0.5832	0.6106	0.6413	0.6713	0.7025	0.7354	0.7701	0.8052	0.8416	0.8788	0.9166	0.9571	0.9958	1.0374
		Replicate 2	0.2279	0.232	0.2348	0.2388	0.2418	0.2453	0.2485	0.2522	0.2564	0.2607	0.2641	0.2689	0.2751	0.2809	0.286	0.2936	0.2994	0.3078	0.3165	0.325	0.3353	0.3474	0.3592	0.3729	0.3877	0.4031	0.4201	0.4391	0.458	0.479	0.5022	0.526	0.5511	0.5787	0.6055	0.6339	0.6642	0.695	0.7293	0.7624	0.7977	0.8333	0.8719	0.9101	0.9492	0.9881	1.0295
		Replicate 3	0.2681	0.2697	0.2709	0.2723	0.2733	0.2743	0.2761	0.278	0.279	0.281	0.2836	0.2852	0.2882	0.2913	0.2949	0.2985	0.3019	0.3054	0.3096	0.3149	0.3188	0.3254	0.3319	0.3375	0.3442	0.353	0.3605	0.3688	0.3777	0.3876	0.3974	0.4096	0.4215	0.4352	0.4488	0.4632	0.4784	0.4952	0.5113	0.5313	0.5502	0.5715	0.5933	0.6154	0.6387	0.6637	0.6885
	JUB1-XC114-GAL4AD/2X	Replicate 1	0.1976	0.2007	0.2046	0.2078	0.2119	0.2157	0.2192	0.224	0.2316	0.2344	0.241	0.247	0.2537	0.2615	0.2702	0.2785	0.2869	0.2976	0.3088	0.3214	0.3344	0.3492	0.3631	0.3804	0.3962	0.4165	0.4348	0.4591	0.4802	0.5061	0.5302	0.5573	0.5849	0.6152	0.6445	0.6763	0.7115	0.7458	0.7814	0.8201	0.8596	0.8972	0.9393	0.9802	1.0251	1.0687	1.1129
		Replicate 2	0.2283	0.2296	0.2323	0.2356	0.2388	0.2426	0.2461	0.2504	0.2558	0.2609	0.2686	0.2749	0.2829	0.291	0.2992	0.3097	0.3199	0.332	0.3442	0.3583	0.3732	0.3883	0.4068	0.426	0.446	0.4672	0.4901	0.5146	0.5393	0.5671	0.594	0.6253	0.6553	0.687	0.7197	0.7535	0.7907	0.8296	0.8699	0.9103	0.9536	0.9961	1.0399	1.0855	1.13	1.1773	1.2248
		Replicate 3	0.2043	0.2075	0.2116	0.2162	0.2203	0.2248	0.2293	0.2342	0.2399	0.2466	0.2539	0.2607	0.2695	0.2779	0.2867	0.2972	0.3079	0.3198	0.3326	0.3454	0.3604	0.3758	0.3923	0.4119	0.4318	0.4535	0.4759	0.5026	0.5272	0.5547	0.5818	0.6134	0.6428	0.6764	0.7115	0.7457	0.7826	0.8187	0.8587	0.9012	0.9417	0.9852	1.0299	1.0746	1.1201	1.1654	1.2126
	JUB1-XC191-EDLLAD/6X	Replicate 1	0.2139	0.2173	0.2219	0.2259	0.2297	0.2347	0.24	0.2464	0.2517	0.2607	0.2676	0.2751	0.2848	0.2947	0.3057	0.3175	0.3304	0.3439	0.3578	0.3727	0.3892	0.4066	0.4273	0.4477	0.4684	0.4923	0.5159	0.5442	0.5697	0.599	0.6292	0.6633	0.6953	0.7308	0.7646	0.803	0.8405	0.8795	0.9221	0.9636	1.0064	1.0514	1.0962	1.1418	1.1889	1.2354	1.2834
		Replicate 2	0.2357	0.2391	0.2439	0.2482	0.2514	0.256	0.2609	0.2672	0.2745	0.2808	0.2877	0.2961	0.3052	0.3145	0.3236	0.3351	0.3477	0.3599	0.3755	0.3915	0.4071	0.4261	0.4446	0.4659	0.4881	0.5119	0.5362	0.5645	0.5909	0.6208	0.65	0.6828	0.7171	0.7532	0.7891	0.8255	0.8646	0.9041	0.944	0.9882	1.0313	1.0751	1.1211	1.1671	1.214	1.2625	1.3098
		Replicate 3	0.2159	0.2191	0.224	0.2278	0.2321	0.2358	0.2416	0.2485	0.254	0.2616	0.2688	0.2773	0.2869	0.2978	0.3082	0.3188	0.3325	0.3453	0.3603	0.3767	0.3938	0.412	0.4306	0.4533	0.4744	0.4993	0.5249	0.5521	0.5788	0.6102	0.6423	0.6753	0.7103	0.7452	0.783	0.8207	0.8608	0.9013	0.9439	0.9872	1.0314	1.0753	1.1229	1.1679	1.2165	1.2632	1.3136
	ProTDH3	Replicate 1	0.2217	0.22	0.219	0.2181	0.2172	0.2173	0.2167	0.2166	0.2162	0.2154	0.2162	0.2156	0.2159	0.2163	0.2167	0.2168	0.2167	0.2171	0.2171	0.217	0.2162	0.2165	0.2157	0.2158	0.2152	0.2164	0.2155	0.2164	0.2158	0.2164	0.2166	0.2161	0.2159	0.2165	0.2165	0.2159	0.2159	0.2152	0.2158	0.2157	0.2162	0.2156	0.216	0.217	0.2167	0.217	0.2173
		Replicate 2	0.1881	0.1867	0.1851	0.1859	0.1856	0.1855	0.185	0.1852	0.1851	0.1846	0.1849	0.1849	0.1847	0.1848	0.1848	0.1852	0.1849	0.1849	0.1848	0.1848	0.1842	0.1843	0.184	0.1838	0.1842	0.1838	0.1834	0.1841	0.1838	0.1841	0.1845	0.1838	0.1834	0.1838	0.1834	0.1831	0.1834	0.1832	0.1831	0.1829	0.183	0.1829	0.1832	0.1832	0.1832	0.1832	0.1827
		Replicate 3	0.1901	0.1892	0.1901	0.19	0.189	0.189	0.1888	0.1885	0.1887	0.1889	0.1887	0.1884	0.1891	0.189	0.1896	0.1895	0.1892	0.1896	0.1892	0.1901	0.1892	0.1907	0.1888	0.1886	0.1885	0.1882	0.1885	0.1886	0.1884	0.1889	0.1888	0.1888	0.1887	0.1889	0.1888	0.1883	0.1891	0.1886	0.1886	0.1886	0.1888	0.189	0.1892	0.1894	0.1895	0.1894	0.1891
[truncated: 89 more columns]
