# Supplementary material
Source: Research Square preprint supplement (doi:10.21203/rs.3.rs-8918280/v1)
Supplement: Supplementary file 3 [file ce17c0edbfb3ecfe6440a00e.xlsx]

## Sheet: Data S3
	Supplementary Data S3. Engineering platform for improved PAPS production in yeast.
	(b) Relative transcriptional level of PAPS-encoding enzymes using JUB1-X synTFs in yeast.
	Non-induction medium						Induction medium
	Genes	Replicate 1	Replicate 2	Replicate 3	Mean	STDEV.S	Genes	Replicate 1	Replicate 2	Replicate 3	Mean	STDEV.S
	FBA1	1	1	1	1	0	FBA1	1	1	1	1	0
	PPK2CpaN	0.02	0.02	0.01	0.015874010519682	0.00577350269189625	PPK2CpaN	3.65	4.54	2.1	3.27	1.23
	ATPS	0.01	0.06	0.31	0.0570827	0.160728	ATPS	9.48	9.74	9.9	9.7	0.21
	APSK	0.19	0.21	0.31	0.231266	0.064291	APSK	11.41	12.99	13.18	12.5	0.97
	(c) PAPS production in strain yJUB1-XPAPS.
	ug/5ul	Replicate 1	Replicate 2	Replicate 3		ug/1000ul	Replicate 1	Replicate 2	Replicate 3		ug/CDW (mg)	Replicate 1	Replicate 2	Replicate 3	Average (mgL−1)	STDEV.S
	Sample					Sample					Sample
	yJUB1-XPAPS	0.45	0.43	0.4		yJUB1-XPAPS	90	86	80		yJUB1-XPAPS	27.6	20.5	16.1	21.4	6
	CDW. Cell (mg)	5.6	4.2	2.9		CDW. Cell (mg)	5.6	4.2	2.9
	(d) Time course growth assay of yeast cells producing PAPS under the control of JUB1-X synTFs
	Time	WTNon-induced			WTInduced			JUB1-X1 PAPSNon-induced			JUB1-X1 PAPSInduced
		Replicate 1	Replicate 2	Replicate 3	Replicate 1	Replicate 2	Replicate 3	Replicate 1	Replicate 2	Replicate 3	Replicate 1	Replicate 2	Replicate 3
	0	0.2324	0.2279	0.2681	0.2277	0.2527	0.212	0.2401	0.235	0.2224	0.23	0.2447	0.2971
	0.25	0.2353	0.232	0.2697	0.2327	0.2563	0.2166	0.2356	0.2343	0.2214	0.2332	0.248	0.326
	0.5	0.2393	0.2348	0.2709	0.2374	0.2602	0.2202	0.2342	0.2335	0.2198	0.2369	0.251	0.3628
	0.75	0.2425	0.2388	0.2723	0.242	0.2621	0.2241	0.2328	0.2331	0.2181	0.2401	0.2551	0.4102
	1	0.2454	0.2418	0.2733	0.2425	0.2658	0.2278	0.2326	0.2329	0.2179	0.2433	0.259	0.4704
	1.25	0.2482	0.2453	0.2743	0.2465	0.2696	0.2308	0.2312	0.2319	0.218	0.2478	0.263	0.5451
	1.5	0.2517	0.2485	0.2761	0.2502	0.2734	0.2349	0.2306	0.232	0.2165	0.2518	0.2668	0.6068
	1.75	0.256	0.2522	0.278	0.2537	0.2772	0.2392	0.2311	0.2311	0.217	0.2559	0.2714	0.664
	2	0.2603	0.2564	0.279	0.2586	0.2817	0.2434	0.2298	0.231	0.2162	0.261	0.2762	0.7302
	2.25	0.2655	0.2607	0.281	0.2622	0.2866	0.2477	0.2306	0.2311	0.2161	0.2659	0.282	0.7904
	2.5	0.2693	0.2641	0.2836	0.2673	0.2903	0.2538	0.2303	0.2313	0.2162	0.2706	0.2872	0.848
	2.75	0.2738	0.2689	0.2852	0.2717	0.2971	0.2588	0.2298	0.231	0.2155	0.2759	0.2923	0.9001
	3	0.2802	0.2751	0.2882	0.2768	0.3028	0.2651	0.2296	0.231	0.2162	0.2807	0.2989	0.9662
	3.25	0.2858	0.2809	0.2913	0.2831	0.3091	0.2717	0.2301	0.231	0.2158	0.2871	0.3044	1.0427
	3.5	0.2919	0.286	0.2949	0.2887	0.315	0.2785	0.2296	0.2301	0.2164	0.293	0.3104	1.1213
	3.75	0.2998	0.2936	0.2985	0.2971	0.3222	0.2867	0.2302	0.2311	0.2156	0.3004	0.3181	1.2002
	4	0.3055	0.2994	0.3019	0.3049	0.3312	0.2942	0.23	0.2307	0.2154	0.3064	0.3255	1.2803
	4.25	0.3142	0.3078	0.3054	0.3124	0.3398	0.3053	0.2299	0.2308	0.216	0.3135	0.3333	1.3579
	4.5	0.3228	0.3165	0.3096	0.3218	0.3494	0.3136	0.2293	0.2302	0.2162	0.3231	0.342	1.4345
	4.75	0.3327	0.325	0.3149	0.3329	0.3597	0.3262	0.23	0.2295	0.2162	0.3318	0.352	1.5059
	5	0.342	0.3353	0.3188	0.3421	0.373	0.3383	0.229	0.2301	0.2158	0.3412	0.3619	1.5778
	5.25	0.3542	0.3474	0.3254	0.3549	0.3852	0.352	0.2292	0.2295	0.2161	0.3511	0.3726	1.6492
	5.5	0.3661	0.3592	0.3319	0.3674	0.399	0.3668	0.2293	0.2292	0.216	0.3629	0.3844	1.7202
	5.75	0.3793	0.3729	0.3375	0.3813	0.414	0.3839	0.2291	0.2296	0.2157	0.3724	0.3966	1.7881
	6	0.3945	0.3877	0.3442	0.3979	0.4309	0.401	0.2296	0.2299	0.2153	0.3833	0.4111	1.8511
	6.25	0.4098	0.4031	0.353	0.4154	0.4492	0.42	0.2295	0.2299	0.2157	0.397	0.4251	1.908
	6.5	0.426	0.4201	0.3605	0.4342	0.4682	0.4414	0.2293	0.2299	0.2159	0.4105	0.4401	1.9611
	6.75	0.446	0.4391	0.3688	0.4541	0.489	0.4619	0.2304	0.2301	0.2161	0.423	0.4569	2.0078
	7	0.4648	0.458	0.3777	0.4733	0.5101	0.4858	0.2297	0.2298	0.2159	0.438	0.4731	2.0562
	7.25	0.486	0.479	0.3876	0.4949	0.5345	0.5112	0.2295	0.2309	0.2161	0.4502	0.4908	2.0912
	7.5	0.5081	0.5022	0.3974	0.5181	0.5576	0.5359	0.2299	0.2301	0.2164	0.4679	0.5121	2.1287
	7.75	0.5322	0.526	0.4096	0.5435	0.5816	0.5636	0.2301	0.2298	0.2166	0.4828	0.5351	2.1569
	8	0.558	0.5511	0.4215	0.5699	0.6077	0.5904	0.2297	0.2301	0.2164	0.5001	0.5621	2.1881
	8.25	0.5832	0.5787	0.4352	0.5949	0.6367	0.6202	0.2302	0.2304	0.2165	0.5159	0.5909	2.2216
	8.5	0.6106	0.6055	0.4488	0.6251	0.6666	0.649	0.2306	0.2297	0.2161	0.5336	0.6267	2.2475
	8.75	0.6413	0.6339	0.4632	0.6531	0.698	0.6823	0.2305	0.23	0.2167	0.5479	0.6647	2.2711
	9	0.6713	0.6642	0.4784	0.6852	0.7285	0.7157	0.2308	0.2306	0.2173	0.5665	0.7122	2.3004
	9.25	0.7025	0.695	0.4952	0.7178	0.7612	0.7488	0.2311	0.2303	0.2167	0.5865	0.7686	2.3228
	9.5	0.7354	0.7293	0.5113	0.7509	0.7946	0.7862	0.2303	0.2309	0.2168	0.6041	0.8319	2.3457
	9.75	0.7701	0.7624	0.5313	0.7863	0.83	0.8255	0.2308	0.2309	0.2173	0.6244	0.8862	2.3645
	10	0.8052	0.7977	0.5502	0.8206	0.8673	0.8588	0.2312	0.2316	0.2177	0.6422	0.9464	2.3806
	10.25	0.8416	0.8333	0.5715	0.8582	0.9018	0.8954	0.2312	0.231	0.2174	0.6645	1.0019	2.3965
	10.5	0.8788	0.8719	0.5933	0.8947	0.9408	0.9352	0.2322	0.2319	0.2183	0.6881	1.0626	2.4064
	10.75	0.9166	0.9101	0.6154	0.9315	0.9776	0.9738	0.2317	0.2319	0.2192	0.7052	1.1294	2.4214
	11	0.9571	0.9492	0.6387	0.9722	1.0169	1.0152	0.2321	0.2319	0.2192	0.7294	1.1948	2.4347
	11.25	0.9958	0.9881	0.6637	1.0117	1.0563	1.0572	0.2328	0.2323	0.219	0.7512	1.2629	2.443
	11.5	1.0374	1.0295	0.6885	1.0521	1.0978	1.0999	0.2329	0.233	0.2191	0.7739	1.3338	2.4529
	11.75	1.078	1.0719	0.7141	1.0939	1.1379	1.1421	0.2325	0.2323	0.2194	0.7957	1.411	2.4626
	12	1.1209	1.1146	0.7424	1.1362	1.1825	1.1854	0.2335	0.2333	0.2205	0.8186	1.4835	2.459
	12.25	1.1656	1.1573	0.7704	1.1792	1.2253	1.2296	0.2336	0.2331	0.2202	0.8413	1.5608	2.4672
	12.5	1.2087	1.2012	0.7999	1.2243	1.269	1.275	0.2345	0.234	0.2199	0.8643	1.6269	2.4773
	12.75	1.2549	1.246	0.8313	1.2679	1.3129	1.3209	0.2356	0.2334	0.2204	0.8893	1.6977	2.4911
	13	1.299	1.2928	0.8608	1.3144	1.3569	1.365	0.2355	0.2346	0.222	0.9153	1.7675	2.4943
	13.25	1.3468	1.3382	0.8938	1.3593	1.4029	1.4123	0.2363	0.2353	0.2221	0.94	1.8328	2.4982
	13.5	1.3943	1.3864	0.9269	1.4063	1.4493	1.4587	0.2367	0.2352	0.223	0.9633	1.8977	2.505
	13.75	1.4414	1.4327	0.9601	1.4506	1.4929	1.5053	0.2373	0.2361	0.224	0.99	1.9575	2.5154
	14	1.486	1.4811	0.9961	1.4982	1.5382	1.5529	0.2384	0.2364	0.2244	1.0164	2.0125	2.5119
	14.25	1.5346	1.5278	1.0326	1.5452	1.5843	1.5984	0.2395	0.2369	0.2248	1.0404	2.0643	2.5186
	14.5	1.5828	1.5762	1.069	1.5926	1.6311	1.6447	0.2397	0.2385	0.226	1.0664	2.1156	2.5285
	14.75	1.6285	1.6214	1.1064	1.6344	1.6734	1.6866	0.2415	0.2384	0.2265	1.0921	2.1578	2.5316
	15	1.6758	1.6702	1.1431	1.6826	1.7185	1.735	0.2421	0.2406	0.2267	1.1169	2.2042	2.5336
	15.25	1.723	1.7171	1.1838	1.7262	1.7652	1.7782	0.243	0.2397	0.2283	1.1426	2.2397	2.545
	15.5	1.7679	1.7632	1.2219	1.7709	1.808	1.8236	0.244	0.2417	0.2288	1.1651	2.2791	2.5546
	15.75	1.8126	1.8085	1.2614	1.8179	1.8504	1.8661	0.2454	0.2421	0.2306	1.1916	2.3103	2.5533
	16	1.8563	1.8539	1.3019	1.858	1.8929	1.9074	0.2472	0.2433	0.2322	1.219	2.3429	2.5535
	16.25	1.9	1.8971	1.3425	1.899	1.9327	1.9469	0.2481	0.2444	0.2324	1.242	2.3685	2.5616
	16.5	1.9419	1.9412	1.3836	1.9401	1.9734	1.9897	0.2504	0.2468	0.2341	1.2675	2.3884	2.5594
	16.75	1.9828	1.9825	1.4238	1.9779	2.0112	2.0259	0.2519	0.247	0.2357	1.2942	2.4167	2.5614
	17	2.0217	2.0238	1.4673	2.0208	2.0508	2.0638	0.2539	0.2485	0.2382	1.3195	2.4358	2.5639
	17.25	2.0608	2.0624	1.5075	2.0562	2.0879	2.1011	0.2551	0.2504	0.2381	1.3443	2.4608	2.5597
	17.5	2.0991	2.1032	1.5484	2.0925	2.1254	2.1382	0.258	0.2524	0.2411	1.3717	2.4796	2.5646
	17.75	2.1371	2.1428	1.5892	2.1302	2.1566	2.1736	0.2589	0.2535	0.2425	1.3951	2.501	2.5711
	18	2.1687	2.1755	1.6287	2.1617	2.1942	2.2077	0.2627	0.2553	0.2457	1.4225	2.522	2.5666
	18.25	2.2058	2.2151	1.6699	2.2	2.2314	2.2446	0.2647	0.2585	0.246	1.4506	2.547	2.5688
	18.5	2.2359	2.2469	1.7099	2.2315	2.2612	2.2748	0.2676	0.2603	0.2487	1.4762	2.5582	2.5645
	18.75	2.268	2.2808	1.75	2.2616	2.2926	2.3075	0.2708	0.262	0.2509	1.5019	2.5856	2.571
	19	2.298	2.3154	1.7881	2.2928	2.3257	2.336	0.2743	0.2656	0.2555	1.5291	2.6001	2.5639
	19.25	2.3235	2.3465	1.8267	2.3275	2.3538	2.3656	0.2779	0.2679	0.2576	1.5543	2.6288	2.5699
	19.5	2.3505	2.3774	1.8663	2.3503	2.3838	2.3935	0.2817	0.2713	0.2606	1.5834	2.6469	2.5675
	19.75	2.3754	2.4075	1.9034	2.3805	2.4137	2.4275	0.2859	0.2744	0.2642	1.6098	2.6621	2.5713
	20	2.3999	2.4349	1.9411	2.4079	2.4419	2.4508	0.2897	0.2769	0.2677	1.6352	2.6762	2.5677
	20.25	2.4219	2.4543	1.9734	2.4304	2.4662	2.4745	0.2949	0.2812	0.2714	1.6615	2.6966	2.574
	20.5	2.4431	2.4893	2.0124	2.4537	2.4877	2.4993	0.2986	0.285	0.2752	1.6873	2.7107	2.5756
	20.75	2.4622	2.5102	2.0491	2.4685	2.5173	2.523	0.3047	0.2895	0.2805	1.7132	2.7222	2.5749
	21	2.4777	2.5336	2.0852	2.4913	2.5309	2.537	0.3103	0.2948	0.2848	1.7377	2.7338	2.5694
	21.25	2.4925	2.5502	2.1159	2.5092	2.5487	2.5636	0.3167	0.299	0.2891	1.7628	2.7382	2.569
	21.5	2.4998	2.569	2.1484	2.5209	2.5679	2.5651	0.3244	0.3048	0.295	1.7898	2.7495	2.5749
	21.75	2.5122	2.5891	2.1812	2.5427	2.58	2.5899	0.3305	0.3087	0.3003	1.8134	2.7703	2.5854
	22	2.5277	2.6072	2.2087	2.5587	2.6047	2.6099	0.3383	0.315	0.3081	1.8357	2.7707	2.5846
	22.25	2.531	2.6193	2.2395	2.5618	2.6163	2.6172	0.3475	0.3217	0.3138	1.8587	2.7825	2.583
	22.5	2.545	2.6368	2.272	2.5807	2.6327	2.6289	0.3561	0.3285	0.3197	1.8838	2.7801	2.5895
	22.75	2.5418	2.6486	2.2999	2.5854	2.6437	2.6456	0.3651	0.3361	0.3265	1.9054	2.7907	2.5909
	23	2.5499	2.6596	2.3272	2.5888	2.6499	2.6515	0.3756	0.3436	0.3372	1.9267	2.8063	2.5902
	23.25	2.5557	2.6661	2.3552	2.6022	2.6632	2.6589	0.3855	0.3515	0.3454	1.9483	2.803	2.5974
	23.5	2.5571	2.6706	2.3796	2.6038	2.6621	2.6703	0.3965	0.3612	0.3534	1.9684	2.8107	2.5995
	23.75	2.5608	2.6867	2.4034	2.6039	2.6785	2.6777	0.4084	0.3705	0.363	1.9878	2.8181	2.5991
	24	2.558	2.6813	2.4283	2.6011	2.68	2.6848	0.4229	0.3801	0.3732	2.0063	2.8111	2.5946
	24.25	2.5678	2.6916	2.4504	2.6164	2.6868	2.6858	0.436	0.3917	0.3834	2.0274	2.839	2.6046
	24.5	2.5631	2.6962	2.4698	2.6061	2.6873	2.6812	0.4513	0.402	0.3962	2.0471	2.8312	2.6062
	24.75	2.564	2.7071	2.4881	2.6117	2.6983	2.6962	0.4669	0.4142	0.406	2.0673	2.8537	2.6131
	25	2.5666	2.7044	2.5081	2.6239	2.7044	2.6998	0.4822	0.4267	0.4196	2.082	2.8435	2.6102
	25.25	2.5723	2.7113	2.5265	2.6246	2.7007	2.7066	0.4997	0.4408	0.432	2.0989	2.847	2.6175
	25.5	2.5631	2.6987	2.5397	2.6171	2.7039	2.6923	0.5177	0.4544	0.4464	2.1175	2.8521	2.6176
	25.75	2.5701	2.7229	2.5585	2.6251	2.7122	2.7135	0.5384	0.4705	0.4602	2.1339	2.8689	2.6179
	26	2.5805	2.7156	2.566	2.6272	2.7166	2.7131	0.5583	0.4874	0.475	2.1519	2.8641	2.6283
	26.25	2.5789	2.7204	2.5772	2.6346	2.7257	2.7112	0.5794	0.5036	0.4916	2.166	2.8754	2.6286
	26.5	2.5839	2.728	2.5882	2.6291	2.7215	2.7136	0.6023	0.5211	0.5093	2.1837	2.8802	2.6312
	26.75	2.5806	2.7298	2.6056	2.6349	2.7246	2.7213	0.6256	0.54	0.5287	2.1946	2.8872	2.6345
	27	2.5866	2.7347	2.6149	2.6353	2.7284	2.7264	0.6506	0.5596	0.5462	2.2171	2.9076	2.6493
	27.25	2.5771	2.7451	2.6167	2.6368	2.7302	2.7244	0.6776	0.5825	0.5657	2.2246	2.882	2.6417
	27.5	2.5889	2.7236	2.6346	2.6373	2.733	2.7178	0.7028	0.6031	0.5877	2.24	2.8865	2.646
	27.75	2.59	2.7377	2.6269	2.6435	2.7382	2.7343	0.7304	0.6289	0.6087	2.2562	2.8935	2.6464
	28	2.5977	2.7449	2.6322	2.6526	2.7521	2.7292	0.7599	0.6496	0.6324	2.2714	2.8892	2.6489
	28.25	2.5964	2.7513	2.637	2.6445	2.7374	2.7319	0.7901	0.6748	0.6547	2.29	2.8969	2.6525
	28.5	2.5902	2.7437	2.6477	2.6482	2.7435	2.7511	0.8218	0.7023	0.6799	2.3035	2.8997	2.6448
	28.75	2.5905	2.7555	2.6495	2.6477	2.7321	2.7398	0.8521	0.7273	0.7037	2.3155	2.8964	2.651
	29	2.5987	2.7531	2.6546	2.6505	2.7529	2.752	0.8841	0.7558	0.7324	2.3267	2.8865	2.6509
	29.25	2.6002	2.7641	2.6609	2.6582	2.7508	2.7429	0.9193	0.7861	0.7587	2.338	2.8845	2.6521
	29.5	2.6004	2.7599	2.6491	2.6522	2.7551	2.7483	0.9537	0.816	0.7866	2.3538	2.8905	2.6473
	29.75	2.6028	2.7593	2.6686	2.6575	2.7588	2.7457	0.9872	0.8449	0.8176	2.3647	2.8767	2.6546
	30	2.6006	2.7673	2.6682	2.6615	2.7546	2.7615	1.0267	0.8775	0.8449	2.375	2.8592	2.6548
	30.25	2.603	2.7716	2.6715	2.6555	2.7618	2.7493	1.0612	0.9106	0.8788	2.3845	2.8557	2.6551
	30.5	2.6004	2.7741	2.6732	2.6728	2.7625	2.7586	1.1001	0.9442	0.9105	2.3975	2.8547	2.6603
	30.75	2.6052	2.7731	2.6808	2.6565	2.7666	2.7626	1.1374	0.9806	0.9443	2.405	2.8427	2.6541
	31	2.6006	2.78	2.687	2.661	2.772	2.7644	1.1782	1.0111	0.9789	2.4142	2.8276	2.6513
	31.25	2.6084	2.788	2.6886	2.6651	2.7674	2.7713	1.2145	1.0481	1.0135	2.421	2.8291	2.6556
	31.5	2.6126	2.7746	2.7042	2.6701	2.7722	2.769	1.2548	1.0854	1.0496	2.4337	2.825	2.6629
	31.75	2.6088	2.7804	2.6985	2.6685	2.7763	2.7592	1.2982	1.122	1.0842	2.4458	2.8181	2.6603
	32	2.6109	2.7928	2.693	2.674	2.7798	2.7721	1.3389	1.1592	1.125	2.4536	2.8185	2.6597
	32.25	2.6185	2.7862	2.6838	2.673	2.7797	2.7746	1.3799	1.1965	1.1625	2.4663	2.8164	2.6592
	32.5	2.6151	2.7794	2.7078	2.6732	2.7888	2.7815	1.4206	1.2351	1.1998	2.4693	2.8043	2.6577
	32.75	2.6151	2.7874	2.7053	2.6755	2.7913	2.7918	1.4615	1.2754	1.2402	2.4798	2.8032	2.6603
	33	2.6224	2.792	2.7047	2.672	2.7923	2.7971	1.5025	1.3143	1.2787	2.4872	2.8016	2.6563
	33.25	2.6153	2.7942	2.7177	2.6777	2.7855	2.7924	1.5433	1.3553	1.3207	2.4992	2.792	2.6657
	33.5	2.6124	2.7914	2.7153	2.6732	2.803	2.7931	1.5828	1.3963	1.3612	2.5029	2.7882	2.663
	33.75	2.6132	2.7981	2.7045	2.6775	2.7916	2.8018	1.6251	1.4342	1.4034	2.5178	2.8075	2.6663
