# Supplementary material
Source: Research Square preprint supplement (doi:10.21203/rs.3.rs-8918280/v1)
Supplement: Supplementary file 5 [file f4d3b8a9eda1476c19c838c2.xlsx]

## Sheet: Data S4
	Supplementary Data S4. Method for HPLC analysis of PAPS-producing samples.
	(a) PAPS calibration curve.
	PAPS (ug)	Area
	0.043478	23460
	0.086957	74833
	0.130435	112196
	0.173913	168324
	0.217391	235706
	0.26087	282042
	0.304348	337858
	0.347826	357132
	0.391304	426531
	0.434783	466726
	0.478261	505290
	0.521739	561386
	0.565217	612208
	0.608696	631464
	0.652174	692018
	0.695652	722009
	0.73913	752274
	0.782609	789639
	0.826087	851724
	0.869565	866055
